# Supplementary material
Source: MDPI journal article supplement (https://www.mdpi.com/2076-3417/12/5/2595)
Supplement: s1 [file s1 › applsci-1575702-supplementary.pdf]

# Supplementary Materials: Heart Failure Patients' Adherence to Hybrid Comprehensive Telerehabilitation and its Impact on Prognosis Based on Data From TELEREH-HF Randomized Clinical Trial

Ewa Piotrowicz, Michael Pencina, Grzegorz Opolski, Wojciech Zaręba, Maciej Banach, Ilona Kowalik, Piotr Orzechowski, Renata Głównyńska, Dominika Szalewska, Sławomir Pluta, Zbigniew Kalarus, Robert Irzmański and Ryszard Piotrowicz

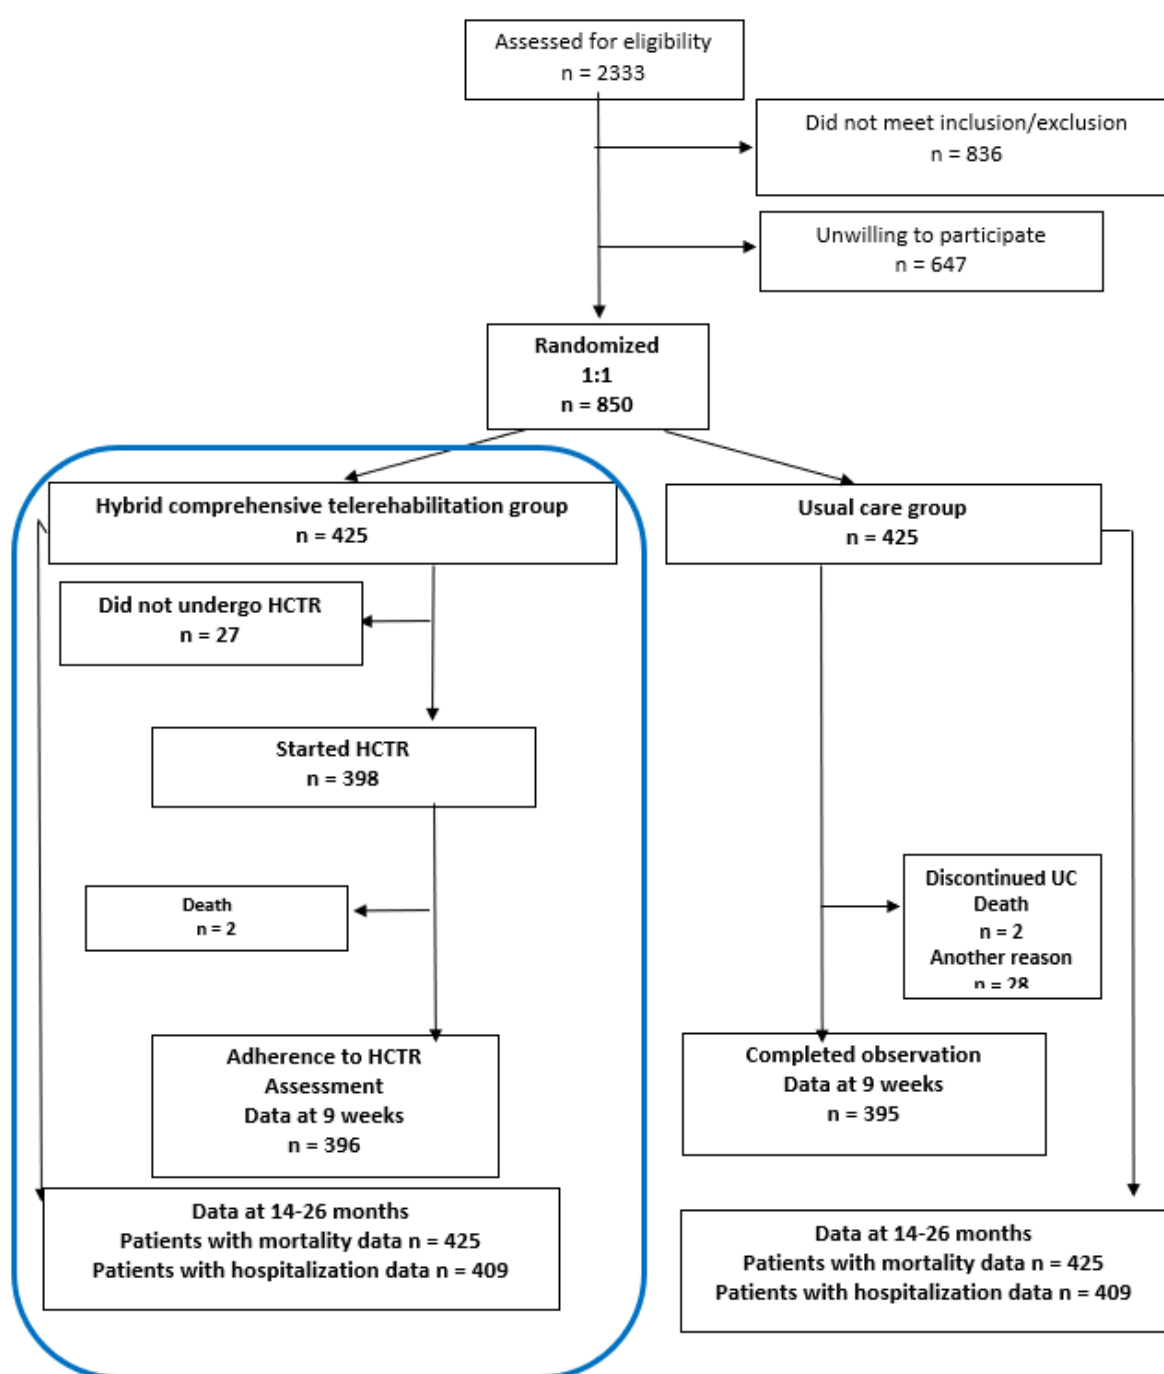

Figure S1. Patient Flow in the Study.

**Table S1.** Exercise training model TELEREH-HF RCT.

| Type of exercise training        | Exercise prescription                                                                                                                                                                                                                                                                                                                                                                                                                                                                                                                                                                                                                                                          |
|----------------------------------|--------------------------------------------------------------------------------------------------------------------------------------------------------------------------------------------------------------------------------------------------------------------------------------------------------------------------------------------------------------------------------------------------------------------------------------------------------------------------------------------------------------------------------------------------------------------------------------------------------------------------------------------------------------------------------|
| Aerobic endurance training       | <p>Devices: Nordic walking poles</p> <p>Training session consists of:</p> <p>1. Warm-up: breathing and light resistance exercises using poles for Nordic walking; duration 5–10 min</p> <p>2. Interval Nordic walking training</p> <p>Intensity: 40–70% of heart rate reserve, perceived exertion level—score of 11–12 on the Borg scale</p> <p>Duration: start at 10 min/session/day<sup>a</sup><br/>15 min/session/day<sup>b</sup><br/>20 min/session/day<sup>c</sup><br/>gradually increased to 30–45 min/session/day<sup>d</sup></p> <p>3. Cool down: relaxation, breathing exercise; duration 5 min</p> <p>Frequency of the aerobic endurance training: 1 session/day</p> |
| Respiratory muscle training      | <p>Devices: Train Air software - during the initial stage at the hospital<br/>Threshold Inspiratory Muscle Trainer - during the basic stage at home</p> <p>Intensity: start at 30% of the maximal inspiratory mouth pressure (<math>PI_{max}</math>) and readjusted to a maximum of 60% (if possible)</p> <p>Duration: minimum 5–10 minutes/day<br/>maximum 20–30 minutes/day;</p> <p>Frequency of the respiratory muscle training: 3–5 times/ throughout the day</p>                                                                                                                                                                                                          |
| Resistance and strength training | <p>Devices: Thera Band - yellow color</p> <p>Intensity: 5–10 repetitions of each of the seven exercises (see Appendix 2)</p> <p>Duration gradually increased 5–10–15 minutes/day</p> <p>Frequency of the resistance and strength exercise training: 1 session/ day</p>                                                                                                                                                                                                                                                                                                                                                                                                         |

Duration of aerobic endurance training depended on the functional capacity in baseline cardiopulmonary exercise test:

<sup>a</sup>baseline peak VO<sub>2</sub> below 10 mL/kg/min.

<sup>b</sup>baseline peak VO<sub>2</sub> 10–18 mL/kg/min.

<sup>c</sup>baseline peak VO<sub>2</sub> over 18 mL/kg/min.
